# Supplementary material for: Characterizing gradients of functional connectome underpinning rumination and their alteration in depression
Source: Research Square preprint supplement (doi:10.21203/rs.3.rs-7277358/v1), 2025-08-17
Supplement: Supplementary file 1 [file e37d2c8379b35902dda13437.docx]

**Supplementary Information**

**SI Results**

**Data Preprocessing**

Data preprocessing was implemented with the toolbox for Data Processing & Analysis for Brain Imaging on Surface (DPABISurf) 1. The preprocessing pipeline involved the following steps: (1) discarding the first five time points; (2) converting the data to BIDS format 2; (3) using fMRIPrep Docker; (4) performing anatomical data preprocessing by correcting T1-weighted image intensity nonuniformity, skull-stripping with ANTs 3, segmenting brain tissues, and reconstructing brain surfaces; (5) conducting functional data preprocessing by generating a reference volume and its skull-stripped version, estimating and processing a B0-nonuniformity map 4, co-registering and correcting the EPI reference for anatomical accuracy, co-registering the BOLD reference to the T1-weighted reference with bbregister 5, estimating head-motion parameters with mcflirt, applying slice-time correction with AFNI's 3dTshift, and resampling the BOLD time series onto fsaverage5 surfaces; (6) performing nuisance regression using the Friston 24-parameter model 6 to regress out head motion confounds, addressing residual motion effects with mean framewise displacement (FDJenkinson) 7, and removing other sources of spurious variance (white matter and cerebrospinal fluid signals) through linear regression to reduce respiratory and cardiac effects. Linear trends were also included as regressors for BOLD signal drifts, and additional regressors were added to account for the impacts of stimulus changes in the task states (rumination and distraction); (7) finally, applying a bandpass temporal filter (0.01–0.1 Hz) to the normalized functional images. Full details are available in the work by Jia et al. 8.

**Regional gradient difference after mixed effect Analysis in the Rum-MDD dataset**

Paired t-tests in the HC participants of validation data proved the variation of DMN and FPN. We used these two brain regions as masks for conducting the mixed-effect analysis on the Rum-MDD dataset. There was not any significant interaction effect after the FDR correction. However, before the correction, the results indicated that the group and the different rumination states have interaction effect in DMN and FPN in the primary-transmodal gradient (Figure S3). As for the visual-sensorimotor gradient, the significant brain network in the HC validation dataset was the dorsal attention network (Figure S3)

Table S1. Differences in gradient explanation ratio, range, variance, and gradient dispersion in three sites between rumination and distraction on the Rum-Beijing dataset

|  |  | IPCAS | | |  | PKUGE | | |  | PKUSIEMENS | | |
| --- | --- | --- | --- | --- | --- | --- | --- | --- | --- | --- | --- | --- |
|  |  | *t* | *p* | Cohen’s f2 |  | *t* | *p* | Cohen’s f2 |  | *t* | *p* | Cohen’s f2 |
| Primary-transmodal gradient | Explanation ratio | -0.299 | 0.766 | 0.003 |  | -0.941 | 0.352 | 0.029 |  | -2.635 | 0.012* | 0.211 |
| Range | -1.439 | 0.158 | 0.067 |  | -0.882 | 0.383 | 0.029 |  | -2.073 | 0.045* | 0.153 |
| Variance | -1.927 | 0.061 | 0.124 |  | -1.512 | 0.138 | 0.075 |  | -2.957 | 0.005** | 0.279 |
| Visual-sensorimotor gradient | Explanation ratio | -0.674 | 0.504 | 0.016 |  | 6.301 | < 0.001*** | 1.265 |  | 3.789 | < 0.001*** | 0.493 |
| Range | 3.158 | 0.003** | 0.137 |  | 3.940 | < 0.001*** | 0.563 |  | 4.577 | < 0.001*** | 0.376 |
| Variance | 1.896 | 0.062 | 0.046 |  | 2.251 | 0.030* | 0.185 |  | 4.007 | < 0.001*** | 0.609 |
| Gradient dispersion | | 0.051 | 0.959 | <0.001 |  | 0.638 | 0.527 | 0.013 |  | 0.676 | 0.503 | 0.014 |

*p < 0.05; **p < 0.01; ***p < 0.001

Table S2. Differences in gradient explanation ratio, range, variance, and gradient dispersion between rumination and distraction on the Rum-MDD dataset

|  | Condition effect | | | | | | |  | Group effect | | | | | | | | | | | |  | Interaction effect | | | | | | |
| --- | --- | --- | --- | --- | --- | --- | --- | --- | --- | --- | --- | --- | --- | --- | --- | --- | --- | --- | --- | --- | --- | --- | --- | --- | --- | --- | --- | --- |
|  | t | p | | Cohen_f2 | | | |  | t | | | | p | | | | Cohen_f2 | | | |  | f | | | p | | | Cohen_f2 |
| **Primary-transmodal gradient** | | | | |  | |  | | | |  |  | | | |  | |  | |  | | | |  | | |
| Explanation ratio | -0.297 | 0.767 | | 0.026 | | | |  | -0.126 | | | | 0.900 | | | | 0.017 | | | |  | 1.238 | | | 0.219 | | | 0.022 |
| Range | -0.199 | 0.842 | | 0.002 | | | |  | -1.818 | | | | 0.071 | | | | < 0.001 | | | |  | 0.360 | | | 0.720 | | | 0.002 |
| Variance | 0.019 | 0.985 | | 0.007 | | | |  | -1.004 | | | | 0.317 | | | | 0.003 | | | |  | 0.568 | | | 0.571 | | | 0.005 |
| **Visual-sensorimotor gradient** | | |  | | |  | | | |  | | | |  |  | | | |  | | | |  | | |
| Explanation ratio | -0.474 | 0.637 | | 0.024 | | | |  | 0.846 | | | | 0.399 | | | | 0.004 | | | |  | 1.217 | | | 0.227 | | | 0.022 |
| Range | 1.176 | 0.243 | | 0.135 | | | |  | 0.351 | | | | 0.726 | | | | 0.023 | | | |  | 1.563 | | | 0.122 | | | 0.034 |
| Variance | 1.943 | 0.055 | | 0.270 | | | |  | 0.604 | | | | 0.547 | | | | 0.026 | | | |  | 1.742 | | | 0.085 | | | 0.043 |
| Gradient dispersion | 1.359 | 0.177 | | 0.170 | | | |  | -0.296 | | | | 0.767 | | | | 0.034 | | | |  | 1.645 | | | 0.104 | | | 0.038 |

Table S3. Differences in gradient explanation ratio between different groups and states on the Rum-MDD dataset

|  |  | explanation ratio | | |  | gradient range | | |  | gradient variance | | |  |
| --- | --- | --- | --- | --- | --- | --- | --- | --- | --- | --- | --- | --- | --- |
|  |  | t | p | Cohen_f2 |  | t | p | Cohen_f2 |  | t | p | Cohen_f2 |  |
| **Primary-transmodal gradient** | |  |  |  |  |  |  |  |  |  |  |  |  |
| Between groups (MDD vs. HC) | Rum. state | 1.292 | 0.200 | 0.019 |  | -1.238 | 0.219 | 0.017 |  | -0.247 | 0.805 | < 0.001 |  |
|  | Dis. state | -0.094 | 0.925 | 0.006 |  | -2.005 | 0.048* | 0.046 |  | -1.055 | 0.294 | 0.013 |  |
| Within groups (Rum. vs. Dis.) | Group MDD | 1.673 | 0.101 | 0.076 |  | 0.492 | 0.625 | 0.004 |  | 1.117 | 0.269 | 0.025 |  |
|  | Group HC | -1.045 | 0.301 | 0.043 |  | -0.431 | 0.668 | 0.005 |  | -0.277 | 0.783 | 0.004 |  |
| **Visual-sensorimotor gradient** | |  |  |  |  |  |  |  |  |  |  |  |  |
| Between groups (MDD vs. HC) | Rum. state | 2.124 | 0.037* | 0.051 |  | 2.278 | 0.025* | 0.059 |  | 2.664 | 0.009** | 0.081 |  |
|  | Dis. state | 0.929 | 0.355 | 0.033 |  | 0.328 | 0.744 | 0.003 |  | 0.554 | 0.581 | 0.004 |  |
| Within groups (Rum. vs. Dis.) | Group MDD | 1.287 | 0.204 | 0.036 |  | 3.284 | 0.002** | 0.265 |  | 4.264 | < 0.001*** | 0.501 |  |
|  | Group HC | -0.756 | 0.453 | 0.017 |  | 1.038 | 0.304 | 0.020 |  | 1.698 | 0.095 | 0.061 |  |

*p < 0.05; **p < 0.01; ***p < 0.001

Table S4. Differences of gradient dispersion between states on the Rum-MDD dataset

|  |  | t | p | Cohen_f2 |
| --- | --- | --- | --- | --- |
| Between groups (MDD vs. HC) | Rum. state | 1.672 | 0.098 | 0.091 |
|  | Dis. state | -0.347 | 0.729 | 0.003 |
| Within groups (Rum. vs. Dis.) | Group MDD | 3.873 | < 0.001*** | 0.387 |
|  | Group HC | 0.914 | 0.365 | 0.013 |

*p < 0.05; **p < 0.01; ***p < 0.001


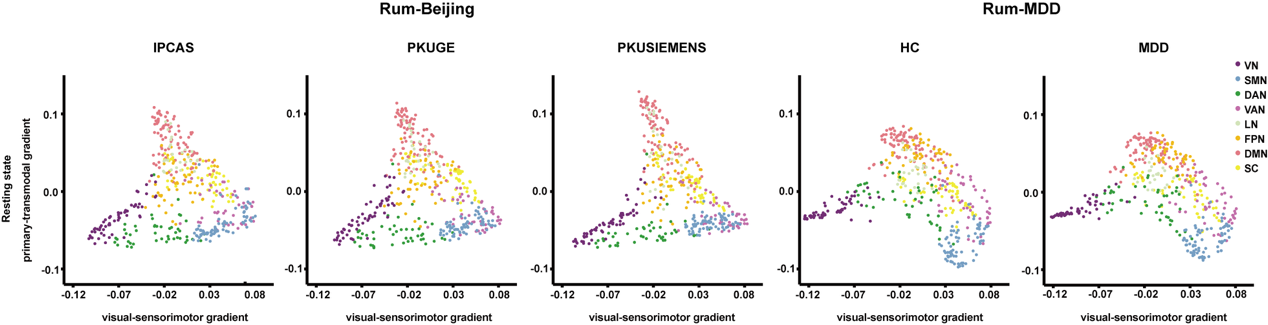


Figure S1. Scatter plots of the gradient score for the first two connectome gradients in the resting state in 3 sites in the Rum-Beijing and the Rum-MDD datasets, and each dot was colored according to 7 networks cortical parcellation and a subcutaneous nucleus.


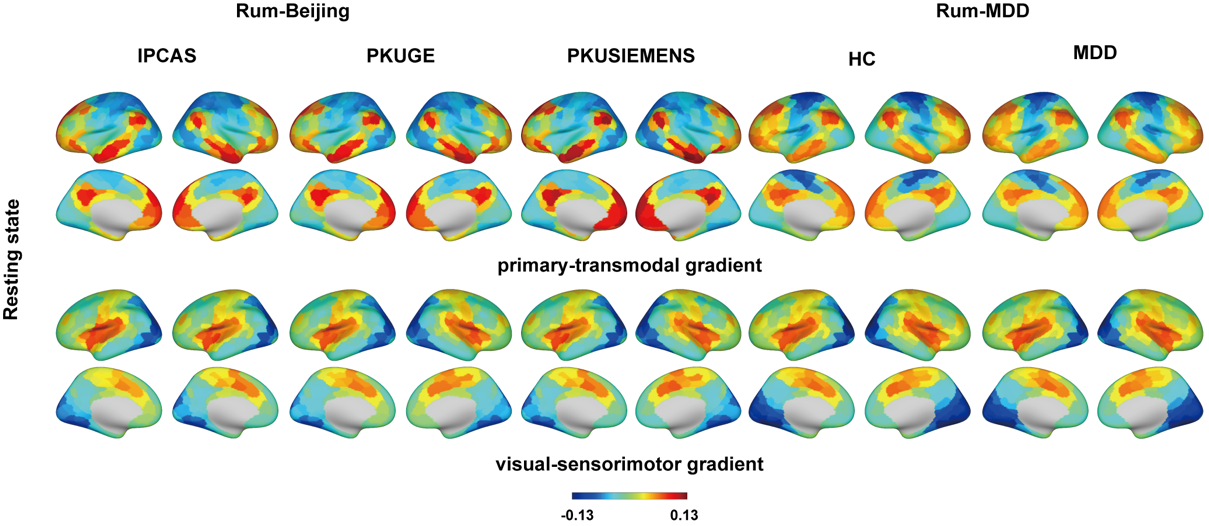


Figure S2. Distribution of the primary-transmodal gradient and the visual-sensorimotor gradient of the resting state in 3 sites in the Rum-Beijing and the Rum-MDD datasets.


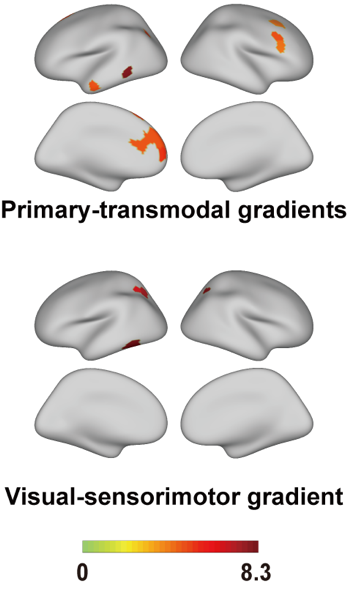


Figure S3. Regions with interaction effect after the mixed effect analysis between the rumination state and the distraction state before the FDR correction in the Rum-MDD dataset.


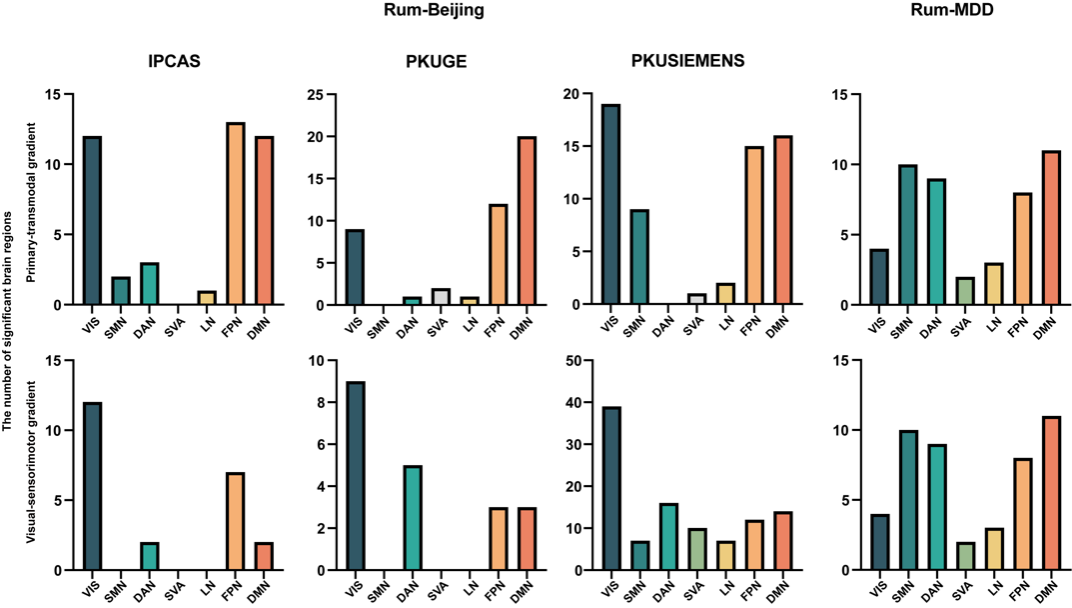


Figure S4. The number of significant clusters for each brain network after paired t-test in the Rum-Beijing dataset and mixed effect analysis in the Rum-MDD dataset.

**Reference:**

1 Yan, C. G., Wang, X. D. & Lu, B. DPABISurf: data processing & analysis for brain imaging on surface. *Sci Bull (Beijing)* <https://doi.org/10.1016/j.scib.2021.09.016> (2021).

2 Gorgolewski, K. J. *et al.* The brain imaging data structure, a format for organizing and describing outputs of neuroimaging experiments. *Sci Data* <https://doi.org/10.1038/sdata.2016.44> (2016).

3 Avants, B., Tustison, N. & Song, G. Advanced normalization tools (ANTS). *Insight J* <https://doi.org/10.54294/uvnhin> (2008).

4 Glasser, M. F. *et al.* The minimal preprocessing pipelines for the Human Connectome Project. *Neuroimage* <https://doi.org/10.1016/j.neuroimage.2013.04.127> (2013).

5 Greve, D. N. & Fischl, B. Accurate and robust brain image alignment using boundary-based registration. *Neuroimage* <https://doi.org/10.1016/j.neuroimage.2009.06.060> (2009).

6 Friston, K. J., Williams, S., Howard, R., Frackowiak, R. S. & Turner, R. Movement-related effects in fMRI time-series. *Magn Reson Med* <https://doi.org/10.1002/mrm.1910350312> (1996).

7 Jenkinson, M., Bannister, P., Brady, M. & Smith, S. Improved optimization for the robust and accurate linear registration and motion correction of brain images. *Neuroimage* <https://doi.org/10.1016/s1053-8119(02)91132-8> (2002).

8 Jia, F. N. *et al.* Aberrant degree centrality profiles during rumination in major depressive disorder. *Hum Brain Mapp* <https://doi.org/10.1002/hbm.26510> (2023).
